# Supplementary material for: Abortion legislation, maternal healthcare, fertility, female literacy, sanitation, violence against women and maternal deaths: a natural experiment in 32 Mexican states
Source: HighWire-hosted journal article supplement (doi:10.1136/bmjopen-2014-006013), 2015-02-01
Supplement: bmjopen-2014-006013supp_Infographics.pdf [file bmjopen-2014-006013supp_Infographics.pdf]

# Infographic 1

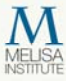

## Maternal and induced abortion-related mortality in 32 Mexican states between 2002 and 2011

### MATERNAL MORTALITY (OVERALL)

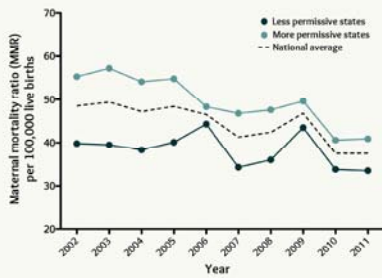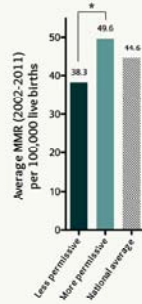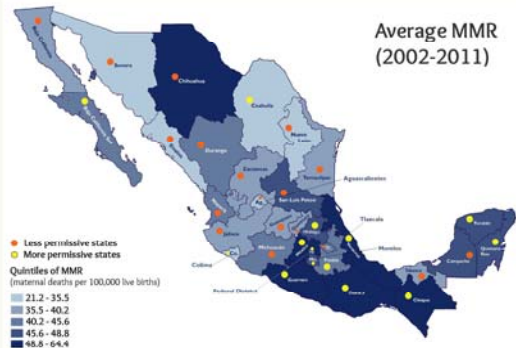

### INDUCED-ABORTION MORTALITY

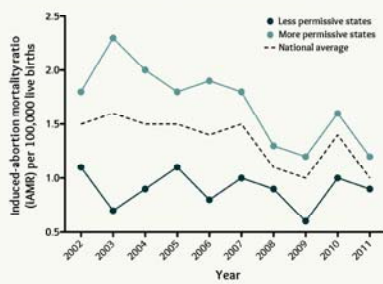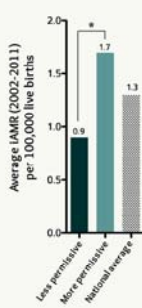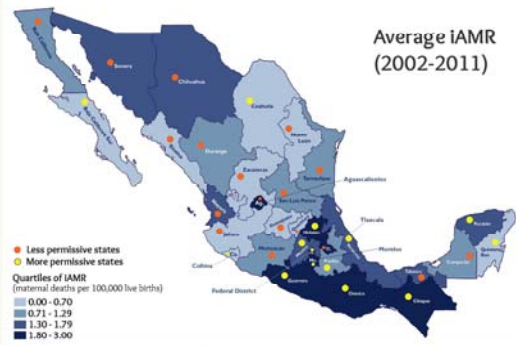

\* Statistically significant difference

Obtained and adapted from "Abortion legislation, maternal healthcare, fertility, female literacy, sanitation, violence against women and maternal deaths: a natural experiment in 32 Mexican states" by Koch E, et al. BMJ Open 2015;5:e006013

# Infographic 2

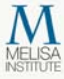

## Contribution of independent variables to explain differences in maternal mortality among Mexican states, 2002-2011

### PRIMARY EXPLANATORY MODEL

#### MATERNAL MORTALITY (OVERALL)

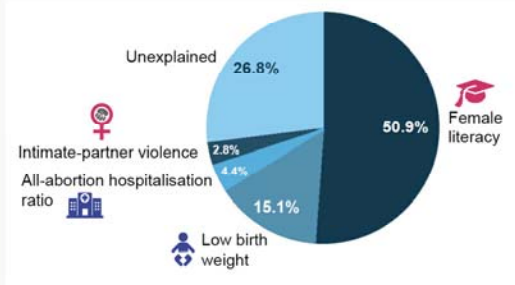

### ALTERNATIVE EXPLANATORY MODELS

#### MATERNAL MORTALITY (OVERALL)

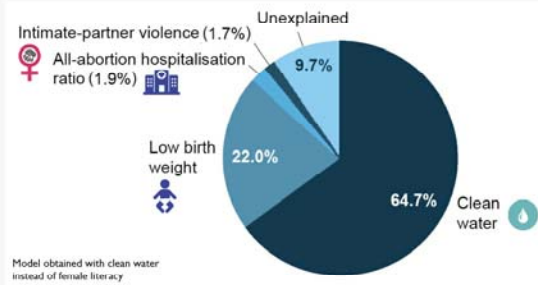

#### MATERNAL MORTALITY WITH ABORTIVE OUTCOME

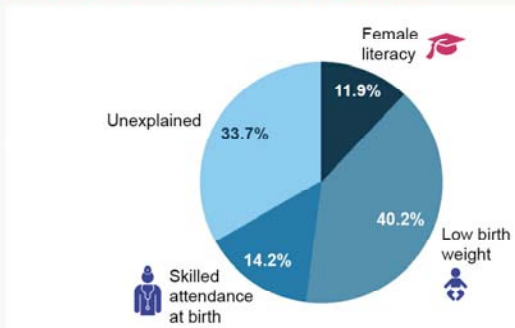

#### MATERNAL MORTALITY WITH ABORTIVE OUTCOME

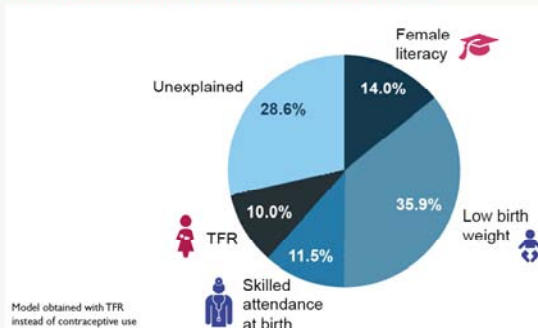

#### INDUCED-ABORTION RELATED MORTALITY

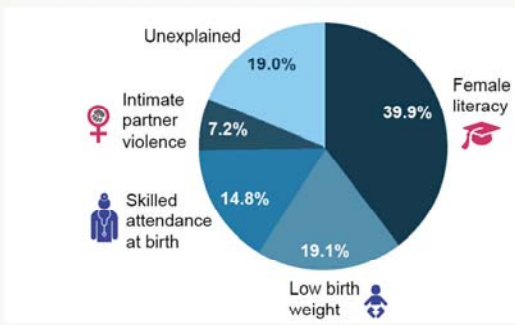

#### INDUCED-ABORTION RELATED MORTALITY

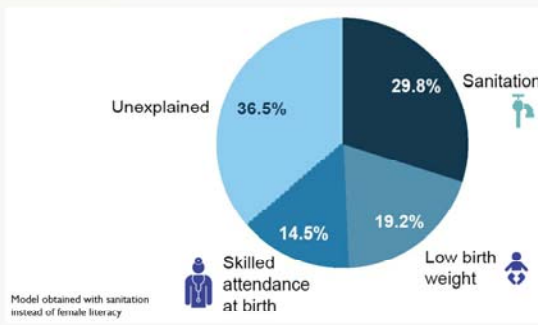

Adapted from explanatory models in "Abortion legislation, maternal healthcare, fertility, female literacy, sanitation, violence against women and maternal deaths: a natural experiment in 32 Mexican states" by Koch E, et al. BMJ Open 2015;5:e006013

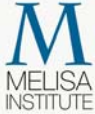

# Evidence-based public health interventions to improve maternal health in Mexico

## INTERVENTIONS

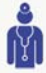

**Increase access to antenatal care and coverage of institutional deliveries**

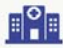

**Increase number of and access to emergency obstetric units**

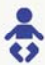

**Expand specialised diagnostic centres and prenatal care for high risk pregnancies with incorporation of other medical specialties**

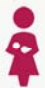

**Increase access to adequate pre-conceptional counselling and family planning programmes to promote healthy childbearing before 35 years of age and to prevent unplanned pregnancies**

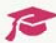

**Strengthen public policies directed to increase the number of schooling years of the female population**

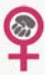

**Improve detection of violence against pregnant women during prenatal visits and intervention by skilled health professionals**

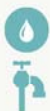

**Address disparities in human development indicators by increasing access to clean water and sanitation coverage**

## PRIORITY STATES

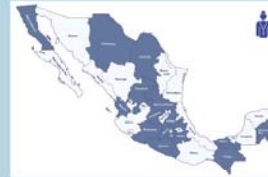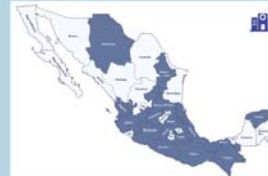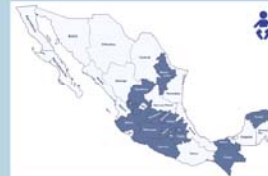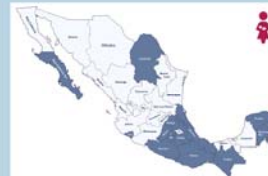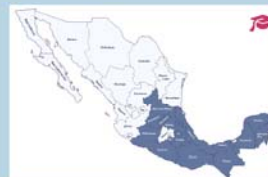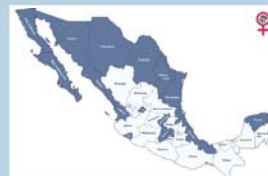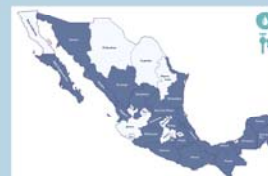

Adapted from "Abortion legislation, maternal healthcare, fertility, female literacy, sanitation, violence against women and maternal deaths: a natural experiment in 32 Mexican states" by Koch E, et al. *BMJ Open* 2015;5:e006013

States were prioritised using the National median of each independent variable
